# Supplementary material
Source: PubMed Central journal article supplement (PMC2843225)
Supplement: supp_M109.096487_jbc.M109.096487-1.pdf [file supp_M109.096487_jbc.M109.096487-1.pdf]

**Supplemental Data**

**STRUCTURE OF RecJ EXONUCLEASE DEFINES ITS SPECIFICITY FOR  
SINGLE-STRANDED DNA**

**Taisuke Wakamatsu, Yoshiaki Kitamura, Yutaro Kotera, Noriko Nakagawa, Seiki  
Kuramitsu, and Ryoji Masui**

**Supplementary Figs. S1–S4**

**References**

# Figure S1

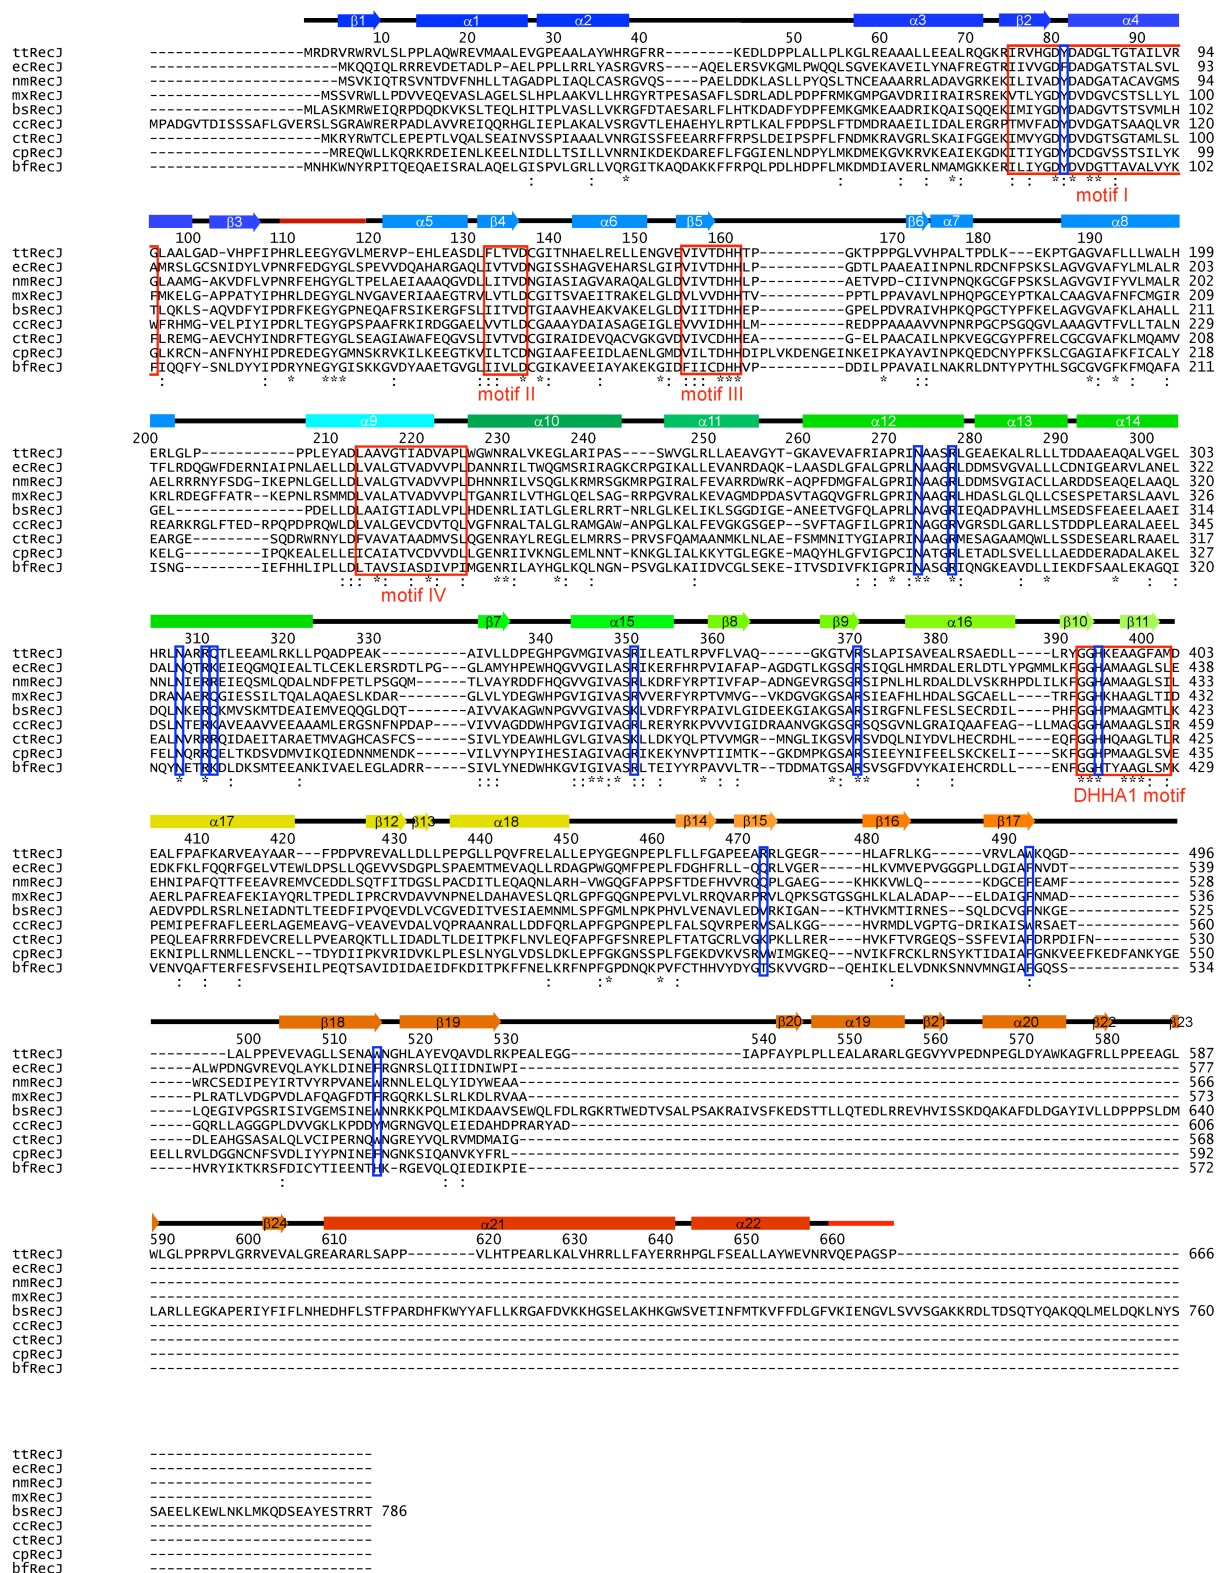

**FIGURE S1. Sequence alignments of *ttRecJ* and its homologs.** The secondary structures of *ttRecJ* are shown above the sequences; the horizontal bars indicate  $\alpha$ -helices and arrows indicate  $\beta$ -strands. Red lines indicate disordered regions. The five motifs proposed by Aravind and Koonin (1) are

designated as red boxes. The possible residue for binding to ssDNA is shown by a blue box. Sequences shown are as follows: ttRecJ (*T. thermophilus* HB8), ecRecJ (*E. coli*), nmRecJ (*Neisseria meningitidis*), mxRecJ (*Myxococcus xanthus*), bsRecJ (*Bacillus subtilis*), ccRecJ (*Caulobacter crescentus*), ctRecJ (*Chlorobium tepidum*), cpRecJ (*Clostridium perfringens*), and bfRecJ (*Bacteroides fragilis*). The sequence alignment was prepared using ClustalW (2).

## Figure S2

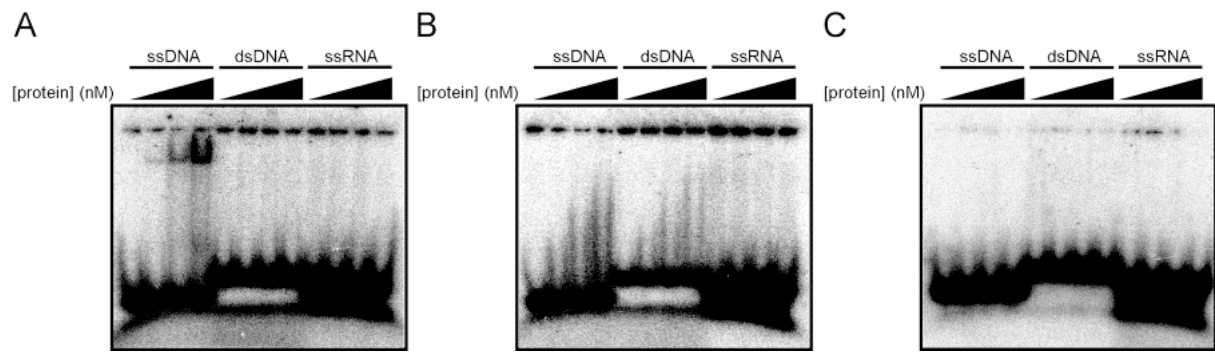

**FIGURE S2. Electrophoretic mobility shift assay with *ttRecJ* (A), *ttRecJ*-OB domain (B), and *cd-ttRecJ* (C).** The reaction mixture containing 50 mM Tris-HCl; 100 mM KCl; 20 mM EDTA; and either 10 nM 5'-<sup>32</sup>P-labeled 21-mer ssDNA or 21-bp dsDNA or 21-mer ssRNA, whose sequence is the same as 21-mer ssDNA except U instead of T; along with 0, 100, 200, and 400 nM protein (pH 7.5) was incubated at 37°C for 10 min.

Figure S3

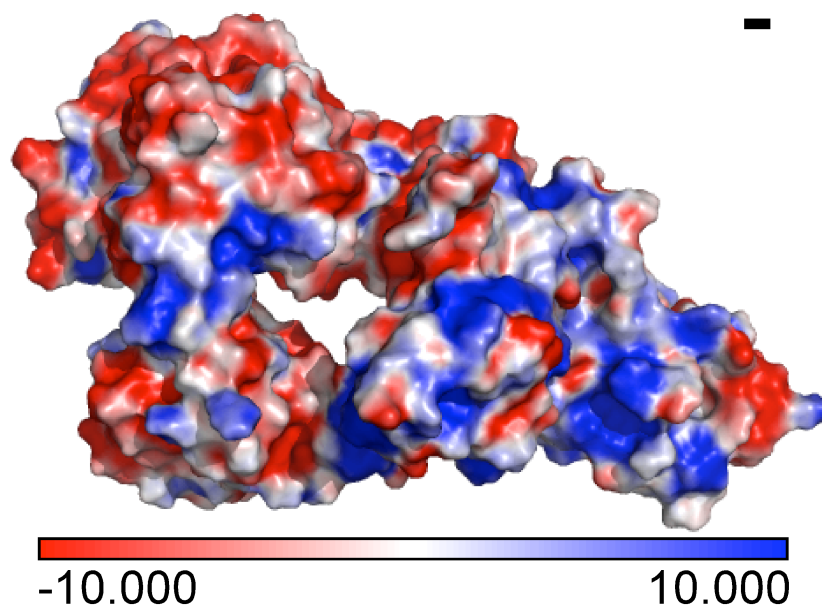

FIGURE S3. **Electrostatic potential is calculated using programs PyMOL and APBS (3).** Regions of positive electrostatic potential are shown in blue; regions of negative potential are red. The active site containing the metal center is located within the hole (at the left side wall). The scale-bar represents 10 Å.

Figure S4

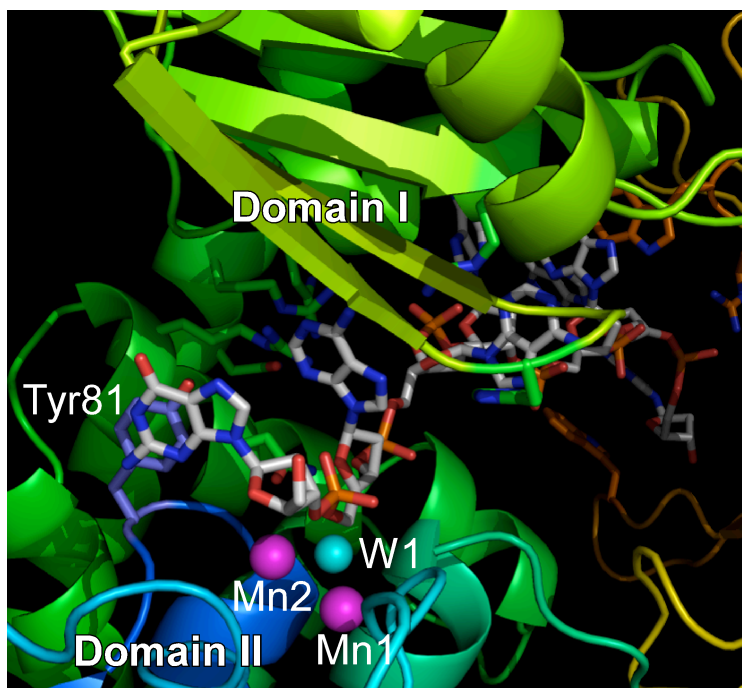

FIGURE S4. An expanded view of the ssDNA-bound model structure. ssDNA and the side chain of Tyr81 are shown as stick forms. Mn<sup>2+</sup> ions and W1 (Fig. 3B) are shown as magenta spheres and a cyan sphere, respectively.

## REFERENCES

1. Aravind, L., and Koonin, E. V. (1998) A novel family of predicted phosphoesterases includes *Drosophila* prune protein and bacterial RecJ exonuclease. *Trends Biochem. Sci.* **23**, 17–19
2. Thompson, J. D., Higgins, D. G., and Gibson, T. J. (1994) CLUSTAL W: improving the sensitivity of progressive multiple sequence alignment through sequence weighting, position-specific gap penalties and weight matrix choice. *Nucleic Acids Res.* **22**, 4673–4680
3. Baker, N. A., Sept, D., Joseph, S., Holst, M. J., and McCammon, J. A. (2001) Electrostatics of nanosystems: Application to microtubules and the ribosome. *Proc. Natl. Acad. Sci. U.S.A.* **98**, 10037–10041
